# Supplementary material for: Characterization of the proneural gene regulatory network during mouse telencephalon development
Source: PubMed Central journal article supplement (PMC2330019; doi:10.1186/1741-7007-6-15), 2008-03-31
Supplement: 1741-7007-6-15-S2.pdf [file 1741-7007-6-15-S2.pdf]

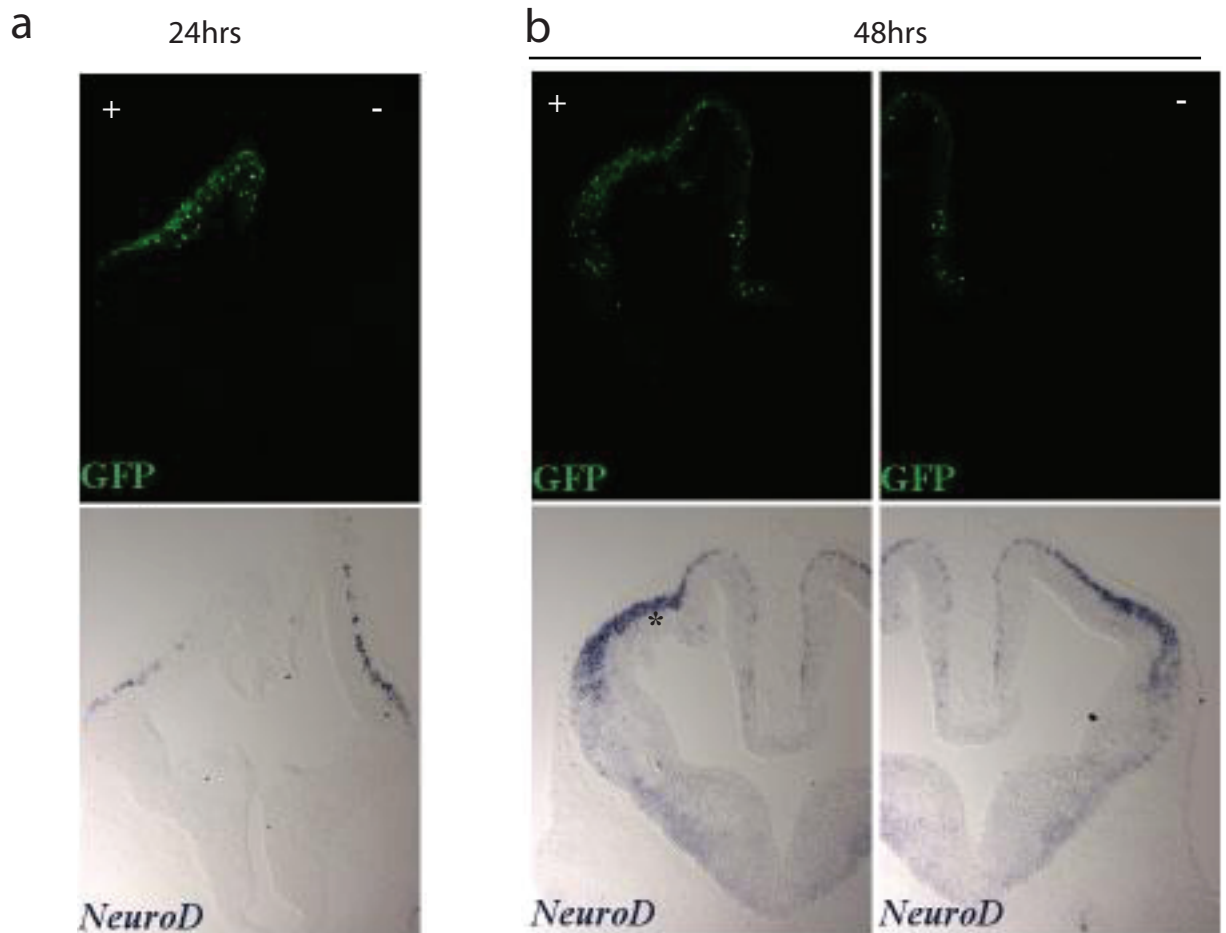

Additional file 2. Expression of the Ngn2 target *NeuroD* analyzed by in situ hybridization in the dorsal telencephalon. Embryos were electroporated with a Ngn2 expressing vector and cultivated for 24hrs (a) or 48hrs (b). *NeuroD* upregulation is only detected 48hrs after Ngn2 electroporation. The GFP staining for two different embryos is also shown.
