# Supplementary material for: Characterization of the proneural gene regulatory network during mouse telencephalon development
Source: PubMed Central journal article supplement (PMC2330019; doi:10.1186/1741-7007-6-15), 2008-03-31
Supplement: 1741-7007-6-15-S3.pdf [file 1741-7007-6-15-S3.pdf]

**Ngn2 targets**

| Ensembl Transcript ID | Description                                                                                                           | Gene Ontology                          | ratio Ngn2GOF | Mash1-/-;Ngn2-/- |
|-----------------------|-----------------------------------------------------------------------------------------------------------------------|----------------------------------------|---------------|------------------|
| ENSMUST00000035499    | neighbor of Punc E11                                                                                                  |                                        | 1.4           | -1.6             |
| ENSMUST00000029674    | ephrin A4                                                                                                             | cell adhesion                          | 2.6           | -1.6             |
| ENSMUST00000059287    | Eph receptor B2                                                                                                       | cell adhesion                          | 1.3           | -1.5             |
| ENSMUST00000064405    | Eph receptor A3                                                                                                       | cell adhesion                          | 1.7           | -1.4             |
| ENSMUST00000020942    | Neuronal cell adhesion molecule precursor (Nr-CAM)                                                                    | cell adhesion                          | 1.6           | -2.6             |
| ENSMUST00000020692    | B-cell translocation gene 2, anti-proliferative                                                                       | cell cycle                             | 2.9           | -1.4             |
| ENSMUST00000037287    | cyclin-dependent kinase inhibitor 1C (P57)                                                                            | cell cycle                             | 1.4           | -3.2             |
| ENSMUST00000031331    | cyclin G2                                                                                                             | cell cycle                             | 1.7           | -1.5             |
| ENSMUST00000030814    | cyclin-dependent kinase 5                                                                                             | cell cycle                             | 2.0           | -1.5             |
| ENSMUST00000029865    | transformation related protein 53 inducible nuclear protein 1                                                         | cell death                             | 2.0           | -2.8             |
| ENSMUST00000034044    | caspase 3                                                                                                             | cell death                             | 3.3           | -1.3             |
| ENSMUST00000029060    | ATPase, class II, type 9A                                                                                             | cellular physiological process         | 1.8           | -2.6             |
| ENSMUST00000021329    | golgi SNAP receptor complex member 2                                                                                  | cellular physiological process         | 1.8           | -1.3             |
| ENSMUST00000035861    | peroxisome biogenesis factor 5                                                                                        | cellular physiological process         | 2.7           | -1.3             |
| ENSMUST00000052076    | ATPase, H+ transporting, V1 subunit G isoform 1                                                                       | cellular physiological process         | 1.3           | -1.3             |
| ENSMUST00000080882    | ATPase, Na+K+ transporting, alpha 3 polypeptide                                                                       | cellular physiological process         | 1.3           | -4.0             |
| ENSMUST00000040603    | amylase-1,6-glycosidase, 4-alpha-glucanotransferase                                                                   | cellular physiological process         | 1.5           | -1.4             |
| ENSMUST00000059115    | mitochondrial tumor suppressor 1                                                                                      | cellular physiological process         | 1.4           | -1.3             |
| ENSMUST00000052897    | thymosin, beta 10 [Source:MarkerSymbol;Acc:MGI:109146]                                                                | cytoskeleton component                 | 1.6           | -1.4             |
| ENSMUST00000041623    | ectodermal-neural cortex 1                                                                                            | cytoskeleton component                 | 1.3           | -1.8             |
| ENSMUST00000069284    | FYVE, RhoGEF and PH domain containing 4                                                                               | cytoskeleton component                 | 2.0           | -1.6             |
| ENSMUST00000021950    | drebrin 1 [Source:MarkerSymbol;Acc:MGI:1931838]                                                                       | cytoskeleton component                 | 1.8           | -1.5             |
| ENSMUST00000010349    | Raver1                                                                                                                | cytoskeleton component                 | 1.7           | -1.3             |
| ENSMUST00000048043    | coronin, actin binding protein, 2B [Source:MarkerSymbol;Acc:MGI:2444283]                                              | cytoskeleton component                 | 1.7           | -9.1             |
| ENSMUST00000070478    | syndecan 3 [Source:MarkerSymbol;Acc:MGI:1349163]                                                                      | cytoskeleton component                 | 1.4           | -1.8             |
| ENSMUST00000092887    | myosin XVIIIa                                                                                                         | cytoskeleton component                 | 1.3           | -1.4             |
| ENSMUST00000003453    | phospholipase D family, member 3 [Source:MarkerSymbol;Acc:MGI:1333782]                                                | enzyme                                 | 1.7           | -1.8             |
| ENSMUST00000007255    | dimethylarginine dimethylaminohydrolase 2 [Source:MarkerSymbol;Acc:MGI:1859016]                                       | enzyme                                 | 1.5           | -1.5             |
| ENSMUST00000029423    | serine (or cysteine) peptidase inhibitor, clade I, member 1                                                           | enzyme                                 | 2.2           | -6.0             |
| ENSMUST00000005651    | P450 (cytochrome) oxidoreductase [Source:MarkerSymbol;Acc:MGI:97744]                                                  | enzyme                                 | 1.4           | -1.3             |
| ENSMUST00000055808    | 3-monooxygenase/tryptophan 5-monooxygenase activation protein, gamma polypeptide [Source:MarkerSymbol;Acc:MGI:108109] | enzyme                                 | 1.6           | -1.6             |
| ENSMUST00000023601    | beta galactosidase alpha 2,6 sialyltransferase 1 [Source:MarkerSymbol;Acc:MGI:108470]                                 | enzyme                                 | 1.3           | -1.4             |
| ENSMUST00000005714    | ubiquitin-conjugating enzyme E2M (UBC12 homolog, yeast) [Source:MarkerSymbol;Acc:MGI:108278]                          | enzyme                                 | 1.4           | -1.3             |
| ENSMUST00000086868    | glycerol-3-phosphate acyltransferase, mitochondrial [Source:MarkerSymbol;Acc:MGI:109162]                              | enzyme                                 | 1.4           | -1.3             |
| ENSMUST00000028005    | microsomal glutathione S-transferase 3                                                                                | enzyme                                 | 1.4           | -1.9             |
| ENSMUST00000071776    | cysteinyI-tRNA synthetase                                                                                             | enzyme                                 | 2.6           | -1.4             |
| ENSMUST00000027488    | calpain 10 [Source:MarkerSymbol;Acc:MGI:1344392]                                                                      | enzyme                                 | 1.5           | -1.8             |
| ENSMUST00000031399    | phosphoserine phosphatase [Source:MarkerSymbol;Acc:MGI:97788]                                                         | kinase/phosphatase                     | 1.4           | -1.4             |
| ENSMUST00000018545    | myotubularin related protein 4 [Source:MarkerSymbol;Acc:MGI:2180699]                                                  | kinase/phosphatase                     | 1.7           | -1.7             |
| ENSMUST00000093394    | LIM motif-containing protein kinase 2 [Source:MarkerSymbol;Acc:MGI:1197517]                                           | kinase/phosphatase                     | 2.1           | -1.5             |
| ENSMUST00000025270    | RIO kinase 3 (yeast)                                                                                                  | kinase/phosphatase                     | 1.5           | -1.3             |
| ENSMUST00000002487    | B-Raf proto-oncogene serine/threonine-protein kinase                                                                  | kinase/phosphatase                     | 1.8           | -1.4             |
| ENSMUST00000077115    | protein tyrosine phosphatase, non-receptor type 15                                                                    | kinase/phosphatase                     | 2.0           | -4.8             |
| ENSMUST00000022212    | polo-like kinase 2 (Drosophila) [Source:MarkerSymbol;Acc:MGI:1099790]                                                 | kinase/phosphatase                     | 1.6           | -2.6             |
| ENSMUST00000033930    | dual specificity phosphatase 4                                                                                        | kinase/phosphatase                     | 1.4           | -8.8             |
| ENSMUST00000057684    | PTK2 protein tyrosine kinase 2                                                                                        | kinase/phosphatase                     | 1.8           | -1.4             |
| ENSMUST00000059733    | dual specificity phosphatase 14 [Source:MarkerSymbol;Acc:MGI:1927168]                                                 | kinase/phosphatase                     | 1.9           | -2.3             |
| ENSMUST00000041965    | Cdc42 binding protein kinase beta [Source:MarkerSymbol;Acc:MGI:2136459]                                               | kinase/phosphatase                     | 1.4           | -1.3             |
| ENSMUST00000020220    | ZNUAK family, SNF1-like kinase, 1                                                                                     | kinase/phosphatase                     | 1.8           | -3.2             |
| ENSMUST00000054996    | growth associated protein 43                                                                                          | neuronal physiology, axogenesis        | 1.5           | -3.0             |
| ENSMUST00000031064    | dihydropyrimidinase-like 5 [Source:MarkerSymbol;Acc:MGI:1929772]                                                      | neuronal physiology, axone guidance    | 1.8           | -1.9             |
| ENSMUST00000000199    | freqenin homolog (Drosophila) [Source:MarkerSymbol;Acc:MGI:109166]                                                    | neuronal physiology, regulation of syr | 1.9           | -1.8             |
| ENSMUST00000035058    | chondroitin sulfate proteoglycan 5 [Source:MarkerSymbol;Acc:MGI:1352747]                                              | neuronal physiology, synaptic transmi  | 1.3           | -1.5             |
| ENSMUST00000060455    | cyclin D-type binding-protein 1                                                                                       | protein binding                        | 1.7           | -1.3             |
| ENSMUST00000080103    | B-cell leukemia/lymphoma 2                                                                                            | protein binding                        | 2.2           | -1.7             |
| ENSMUST00000081165    | amyloid beta (A4) precursor protein-binding, family B, member 1 [Source:MarkerSymbol;Acc:MGI:107765]                  | protein binding                        | 2.0           | -1.4             |
| ENSMUST00000080803    | olfactomedin 1 [Source:MarkerSymbol;Acc:MGI:1860437]                                                                  | protein binding                        | 1.5           | -1.8             |
| ENSMUST00000079924    | BTB (POZ) domain containing 9 [Source:MarkerSymbol;Acc:MGI:1916625]                                                   | protein binding                        | 1.7           | -1.5             |
| ENSMUST00000030588    | polyhomeotic-like 2 (Drosophila)                                                                                      | protein binding                        | 1.5           | -1.4             |
| ENSMUST00000008999    | histone deacetylase 5 [Source:MarkerSymbol;Acc:MGI:1333784]                                                           | regulation of transcription            | 1.3           | -2.1             |
| ENSMUST00000026120    | basic helix-loop-helix domain containing, class B5                                                                    | regulation of transcription            | 3.5           | -1.7             |
| ENSMUST00000055001    | Kruppel-like factor 7 (ubiquitous)                                                                                    | regulation of transcription            | 1.3           | -2.3             |
| ENSMUST00000059794    | nescient helix loop helix 1                                                                                           | regulation of transcription            | 1.7           | -18.0            |
| ENSMUST00000032551    | zinc finger protein interacting with K protein 1                                                                      | regulation of transcription            | 2.7           | -1.4             |
| ENSMUST00000020974    | inhibitor of DNA binding 2 [Source:MarkerSymbol;Acc:MGI:96397]                                                        | regulation of transcription            | 2.0           | -2.1             |

|                     |                                                                                                                                     |                              |     |       |
|---------------------|-------------------------------------------------------------------------------------------------------------------------------------|------------------------------|-----|-------|
| ENSMUST00000024123  | centaurin, gamma 3 [Source:MarkerSymbol;Acc:MGI:2183446]                                                                            | regulation of transcription  | 2.4 | -2.3  |
| ENSMUST00000017945  | MAX-like protein X [Source:MarkerSymbol;Acc:MGI:108398]                                                                             | regulation of transcription  | 1.5 | -1.8  |
| ENSMUST00000006761  | CBFA2T1 identified gene homolog (human) [Source:MarkerSymbol;Acc:MGI:104793]                                                        | regulation of transcription  | 1.3 | -1.9  |
| ENSMUST00000075448  | nuclear factor I/A [Source:MarkerSymbol;Acc:MGI:108056]                                                                             | regulation of transcription  | 1.4 | -1.8  |
| ENSMUST00000028139  | cofactor required for Sp1 transcriptional activation, subunit 8                                                                     | regulation of transcription  | 1.9 | -1.4  |
| ENSMUST00000030407  | lung carcinoma myc related oncogene 1                                                                                               | regulation of transcription  | 1.4 | -1.3  |
| ENSMUST00000079063  | SRY-box containing gene 11                                                                                                          | regulation of transcription  | 1.7 | -1.6  |
| ENSMUST00000020129  | kit ligand [Source:MarkerSymbol;Acc:MGI:96974]                                                                                      | regulation of transcription  | 1.3 | -1.3  |
| ENSMUST00000086851  | hairy and enhancer of split 6 (Drosophila)                                                                                          | regulation of transcription  | 6.0 | -2.9  |
| ENSMUST00000049621  | hairy and enhancer of split 5 (Drosophila)                                                                                          | regulation of transcription  | 1.5 | -20.8 |
| ENSMUST00000044455  | zinc finger protein 451 [Source:MarkerSymbol;Acc:MGI:2137896]                                                                       | regulation of transcription  | 1.4 | -1.7  |
| ENSMUST00000077225  | zinc finger protein 238 [Source:MarkerSymbol;Acc:MGI:1353609]                                                                       | regulation of transcription  | 1.3 | -1.9  |
| ENSMUST00000048145  | RNA binding motif protein 9                                                                                                         | RNA binding                  | 2.2 | -2.7  |
| ENSMUST00000028251  | RNA binding motif protein 18                                                                                                        | RNA binding                  | 1.7 | -1.3  |
| ENSMUST00000008633  | ELAV-like 2 (Hu antigen B)                                                                                                          | RNA binding                  | 1.4 | -1.6  |
| ENSMUST00000024260  | poly(rC) binding protein 4 [Source:MarkerSymbol;Acc:MGI:1890471]                                                                    | RNA binding                  | 1.8 | -1.6  |
| ENSMUST00000003501  | ELAV (embryonic lethal, abnormal vision, Drosophila)-like 3 (Hu antigen C) [Source:MarkerSymbol;Acc:MGI:109157]                     | RNA binding                  | 1.3 | -2.7  |
| ENSMUST00000001386  | ELAV-like 4 (Hu antigen D)                                                                                                          | RNA binding                  | 1.9 | -2.7  |
| ENSMUST00000020537  | neuron specific gene family member 2 [Source:MarkerSymbol;Acc:MGI:1202070]                                                          | signal transduction/Receptor | 1.4 | -2.4  |
| ENSMUST000000092470 | CDC42 effector protein (Rho GTPase binding) 4 [Source:MarkerSymbol;Acc:MGI:1929760]                                                 | signal transduction/Receptor | 1.9 | -1.4  |
| ENSMUST00000023225  | glutamate receptor, ionotropic, N-methyl D-aspartate-associated protein 1 (glutamate binding) [Source:MarkerSymbol;Acc:MGI:1913418] | signal transduction/Receptor | 1.4 | -1.7  |
| ENSMUST00000025805  | cornichon homolog 2 (Drosophila)                                                                                                    | signal transduction/Receptor | 1.7 | -2.9  |
| ENSMUST00000065587  | chemokine orphan receptor 1                                                                                                         | signal transduction/Receptor | 1.8 | -5.1  |
| ENSMUST00000034296  | phosphatidylinositol 3-kinase, regulatory subunit, polypeptide 2 (p85 beta) [Source:MarkerSymbol;Acc:MGI:1098772]                   | signal transduction/Receptor | 1.3 | -1.6  |
| ENSMUST00000062801  | membrane protein, palmitoylated 3 (MAGUK p55 subfamily member 3) [Source:MarkerSymbol;Acc:MGI:1328354]                              | signal transduction/Receptor | 1.3 | -1.7  |
| ENSMUST00000004326  | plexin A3 [Source:MarkerSymbol;Acc:MGI:107683]                                                                                      | signal transduction/Receptor | 2.9 | -1.5  |
| ENSMUST00000069557  | MAD homolog 5 (Drosophila) [Source:MarkerSymbol;Acc:MGI:1328787]                                                                    | signal transduction/Receptor | 3.9 | -1.4  |
| ENSMUST00000093272  | G protein-coupled receptor 56 [Source:MarkerSymbol;Acc:MGI:1340051]                                                                 | signal transduction/Receptor | 1.3 | -1.4  |
| ENSMUST00000067591  | somatostatin receptor 2                                                                                                             | signal transduction/Receptor | 1.9 | -2.4  |
| ENSMUST00000039431  | neurotrophic tyrosine kinase, receptor, type 3                                                                                      | signal transduction/Receptor | 2.4 | -2.6  |
| ENSMUST00000068958  | CDC42 effector protein (Rho GTPase binding) 3                                                                                       | signal transduction/Receptor | 1.6 | -1.4  |
| ENSMUST00000001347  | Rho family GTPase 2                                                                                                                 | signal transduction/Receptor | 2.1 | -4.5  |
| ENSMUST00000025279  | Niemann Pick type C1                                                                                                                | signal transduction/Receptor | 1.6 | -1.4  |
| ENSMUST00000049126  | delta/notch-like EGF-related receptor                                                                                               | signal transduction/Receptor | 1.4 | -3.0  |
| ENSMUST00000026826  | Rab40c, member RAS oncogene family [Source:MarkerSymbol;Acc:MGI:2183454]                                                            | signal transduction/Receptor | 1.5 | -1.6  |
| ENSMUST00000037048  | monocyte to macrophage differentiation-associated 2 [Source:MarkerSymbol;Acc:MGI:1922354]                                           | signal transduction/Receptor | 1.4 | -6.1  |
| ENSMUST00000080421  | mitogen activated protein kinase 8 interacting protein 1 [Source:MarkerSymbol;Acc:MGI:1309464]                                      | signal transduction/Receptor | 1.6 | -1.5  |
| ENSMUST00000024979  | mitogen-activated protein kinase 8 interacting protein 3                                                                            | signal transduction/Receptor | 1.8 | -1.5  |
| ENSMUST00000016672  | MAP kinase-activated protein kinase 2 [Source:MarkerSymbol;Acc:MGI:109298]                                                          | signal transduction/Receptor | 2.1 | -1.4  |
| ENSMUST00000019611  | RAC/CDC42 exchange factor                                                                                                           | signal transduction/Receptor | 2.0 | -1.9  |
| ENSMUST00000049239  | mitogen-activated protein kinase kinase kinase 5 [Source:MarkerSymbol;Acc:MGI:1925503]                                              | signal transduction/Receptor | 1.5 | -1.3  |
| ENSMUST0000005100   | guanine nucleotide binding protein (G protein), gamma 2 subunit                                                                     | signal transduction/Receptor | 3.0 | -3.3  |
| ENSMUST00000043624  | thyroid hormone receptor associated protein 1                                                                                       | signal transduction/Receptor | 1.9 | -1.3  |
| ENSMUST00000049149  | low density lipoprotein receptor-related protein 1 [Source:MarkerSymbol;Acc:MGI:96828]                                              | signal transduction/Receptor | 1.3 | -1.5  |
| ENSMUST00000032322  | low density lipoprotein receptor-related protein 6 [Source:MarkerSymbol;Acc:MGI:1298218]                                            | signal transduction/Receptor | 1.4 | -1.6  |
| ENSMUST00000020027  | tumor differentially expressed 2                                                                                                    | signal transduction/Receptor | 2.8 | -1.3  |
| ENSMUST00000064921  | epidermal growth factor receptor [Source:MarkerSymbol;Acc:MGI:95294]                                                                | signal transduction/Receptor | 1.4 | -1.6  |
| ENSMUST00000033642  | doublecortin                                                                                                                        | signal transduction/Receptor | 2.0 | -3.1  |
| ENSMUST00000020408  | transformed mouse 3T3 cell double minute 2                                                                                          | signal transduction/Receptor | 1.3 | -1.4  |
| ENSMUST00000027952  | plexin A2                                                                                                                           | signal transduction/Receptor | 3.0 | -1.7  |
| ENSMUST00000052172  | chemokine (C-X-C motif) receptor 4 [Source:MarkerSymbol;Acc:MGI:109563]                                                             | signal transduction/Receptor | 1.3 | -1.5  |
| ENSMUST00000017836  | rhomboid, veinlet-like 4 (Drosophila)                                                                                               | signal transduction/Receptor | 9.8 | -2.7  |
| ENSMUST00000014917  | delta-like 1 (Drosophila)                                                                                                           | signal transduction/Receptor | 2.0 | -2.5  |
| ENSMUST00000018313  | manic fringe homolog (Drosophila)                                                                                                   | signal transduction/Receptor | 2.9 | -3.2  |
| ENSMUST00000030571  | brain-specific angiogenesis inhibitor 2 [Source:MarkerSymbol;Acc:MGI:2451244]                                                       | signal transduction/Receptor | 1.7 | -2.5  |
| ENSMUST00000023015  | wingless-related MMTV integration site 7B [Source:MarkerSymbol;Acc:MGI:98962]                                                       | signal transduction/Receptor | 2.4 | -2.5  |
| ENSMUST00000054294  | frizzled homolog 1 (Drosophila) [Source:MarkerSymbol;Acc:MGI:1196625]                                                               | signal transduction/Receptor | 1.7 | -2.0  |
| ENSMUST00000040687  | Tax1 (human T-cell leukemia virus type I) binding protein 3 [Source:MarkerSymbol;Acc:MGI:1923531]                                   | signal transduction/Receptor | 1.4 | -1.3  |
| ENSMUST00000007241  | frizzled homolog 3 (Drosophila)                                                                                                     | signal transduction/Receptor | 1.4 | -1.5  |
| ENSMUST00000034566  | DIX domain containing 1 [Source:MarkerSymbol;Acc:MGI:2679721]                                                                       | signal transduction/Receptor | 2.0 | -3.8  |
| ENSMUST00000010038  | RIKEN cDNA 1110031B06 gene (1110031B06Rik), mRNA [Source:RefSeq;Acc:NM_144521]                                                      | transport                    | 1.3 | -1.4  |
| ENSMUST00000023040  | peroxisomal integral membrane protein 47 [Source:MarkerSymbol;Acc:MGI:1931461]                                                      | transport                    | 1.5 | -1.3  |
| ENSMUST00000034830  | cellular retinoic acid binding protein 1                                                                                            | transport                    | 1.8 | -2.1  |
| ENSMUST00000021717  | kinesin 2 [Source:MarkerSymbol;Acc:MGI:107978]                                                                                      | transport                    | 3.9 | -2.4  |
| ENSMUST00000025110  | synaptotagmin IV [Source:MarkerSymbol;Acc:MGI:101759]                                                                               | transport                    | 1.8 | -2.6  |
| ENSMUST00000050000  | syntaxin binding protein 1                                                                                                          | transport                    | 2.1 | -4.6  |
| ENSMUST00000024575  | t-complex protein 10c [Source:MarkerSymbol;Acc:MGI:98543]                                                                           | unknown                      | 2.1 | -1.5  |
| ENSMUST00000051937  | RAS-like, family 11, member B                                                                                                       | unknown                      | 2.0 | -1.3  |
| ENSMUST00000021466  | spastic paraplegia 3A homolog (human) [Source:MarkerSymbol;Acc:MGI:1921241]                                                         | unknown                      | 1.4 | -1.9  |

|                    |                                                                                                                                                               |         |     |      |
|--------------------|---------------------------------------------------------------------------------------------------------------------------------------------------------------|---------|-----|------|
| ENSMUST00000086500 | PREDICTED: similar to microtubule-associated protein 1 light chain 3 beta [Source:RefSeq_peptide_predicted;Acc:XP_486190]                                     | unknown | 1.5 | -1.3 |
| ENSMUST00000040877 | prion protein dublet [Source:MarkerSymbol;Acc:MGI:1346999]                                                                                                    | unknown | 2.2 | -1.4 |
| ENSMUST00000077548 | CTTNBP2 N-terminal like [Source:MarkerSymbol;Acc:MGI:1933137]                                                                                                 | unknown | 1.3 | -1.7 |
| ENSMUST00000088929 | limb expression 1 homolog (chicken) [Source:MarkerSymbol;Acc:MGI:1913893]                                                                                     | unknown | 1.3 | -1.4 |
| ENSMUST00000054776 | pleckstrin homology domain containing, family F (with FYVE domain) member 2                                                                                   | unknown | 2.0 | -1.6 |
| ENSMUST00000046945 | paralemmin [Source:MarkerSymbol;Acc:MGI:1261814]                                                                                                              | unknown | 1.3 | -1.9 |
| ENSMUST00000040967 | ATP-binding cassette, sub-family B (MDR/TAP), member 9                                                                                                        | unknown | 2.0 | -1.6 |
| ENSMUST00000087029 | rap2 interacting protein x [Source:RefSeq_peptide;Acc:NP_081806]                                                                                              | unknown | 1.7 | -4.0 |
| ENSMUST00000034285 | Fc receptor-like mucin-like 1                                                                                                                                 | unknown | 2.0 | -5.4 |
| ENSMUST00000068023 | immunoglobulin superfamily, member 4C [Source:MarkerSymbol;Acc:MGI:2449088]                                                                                   | unknown | 2.7 | -2.7 |
| ENSMUST00000045473 | transmembrane and coiled-coil domains 2 [Source:MarkerSymbol;Acc:MGI:1916125]                                                                                 | unknown | 1.4 | -1.7 |
| ENSMUST00000041555 | RIKEN cDNA 2610528K11 gene (2610528K11Rik), mRNA [Source:RefSeq_dna;Acc:NM_175184]                                                                            | unknown | 1.4 | -1.5 |
| ENSMUST00000054343 | AKT1 substrate 1 (proline-rich) [Source:MarkerSymbol;Acc:MGI:1914855]                                                                                         | unknown | 2.5 | -1.3 |
| ENSMUST00000031391 | B-cell CLL/lymphoma 7A                                                                                                                                        | unknown | 1.3 | -1.8 |
| ENSMUST00000025092 | RIKEN cDNA 2810417M05 gene [Source:MarkerSymbol;Acc:MGI:1915277]                                                                                              | unknown | 2.0 | -2.8 |
| ENSMUST00000048292 | cat eye syndrome chromosome region, candidate 2 homolog (human)                                                                                               | unknown | 1.7 | -1.4 |
| ENSMUST00000093290 | pellino 1 [Source:MarkerSymbol;Acc:MGI:1914495]                                                                                                               | unknown | 2.1 | -1.7 |
| ENSMUST00000091518 | Gag protein                                                                                                                                                   | unknown | 2.9 | -2.8 |
| ENSMUST00000034145 | RIKEN cDNA 4933431N12 gene (4933431N12Rik), mRNA [Source:RefSeq_dna;Acc:NM_027758]                                                                            | unknown | 2.2 | -2.1 |
| ENSMUST00000038841 | RIKEN cDNA 4933402J24 gene (4933402J24Rik), mRNA [Source:RefSeq_dna;Acc:NM_028940]                                                                            | unknown | 1.7 | -1.6 |
| ENSMUST00000031094 | TBC1 domain family, member 14 [Source:MarkerSymbol;Acc:MGI:1098708]                                                                                           | unknown | 2.4 | -2.4 |
| ENSMUST00000061904 | 2 cells egg cDNA, RIKEN full-length enriched library, clone:B020037P20 product:E1A binding protein p400, full insert sequence. [Source:RefSeq;Acc:U000000000] | unknown | 1.5 | -2.3 |
| ENSMUST00000085539 | MKIAA1250 protein (Fragment). [Source:Uniprot/SPTREMBL;Acc:Q80TG7]                                                                                            | unknown | 1.4 | -1.3 |
| ENSMUST00000057935 | RIKEN cDNA B430110G05 gene (B430110G05Rik)                                                                                                                    | unknown | 1.5 | -1.6 |
| ENSMUST00000058667 | leucine rich repeat containing 4B [Source:RefSeq_peptide;Acc:NP_937893]                                                                                       | unknown | 2.3 | -1.6 |
| ENSMUST00000051145 | WD repeat domain 47 [Source:MarkerSymbol;Acc:MGI:2139593]                                                                                                     | unknown | 1.8 | -1.5 |
| ENSMUST00000050001 | RIKEN full-length enriched libraryA230015N21                                                                                                                  | unknown | 3.2 | -1.7 |
| ENSMUST00000037795 | RIKEN cDNA 6330407J23 gene (6330407J23Rik), mRNA [Source:RefSeq_dna;Acc:NM_026138]                                                                            | unknown | 1.5 | -1.9 |
| ENSMUST00000043618 | heet (homologous to the E6-AP (UBE3A) carboxyl terminus) domain and RCC1 (CHC1)-like domain (RLD) 1 [Source:MarkerSymbol;Acc:U000000000]                      | unknown | 1.9 | -1.3 |
| ENSMUST00000086034 | CAR-like membrane protein                                                                                                                                     | unknown | 1.4 | -1.3 |
| ENSMUST00000023219 | F-box and leucine-rich repeat protein 6                                                                                                                       | unknown | 1.6 | -1.3 |
| ENSMUST00000033519 | t-complex-associated-testis-expressed 1-like [Source:MarkerSymbol;Acc:MGI:1914367]                                                                            | unknown | 1.8 | -1.4 |
| ENSMUST00000067880 | a disintegrin and metallopeptidase domain 10 [Source:MarkerSymbol;Acc:MGI:109548]                                                                             | unknown | 1.7 | -1.3 |
| ENSMUST00000044297 | insulin-like growth factor binding protein-like 1 [Source:MarkerSymbol;Acc:MGI:1933198]                                                                       | unknown | 1.6 | -3.7 |
| ENSMUST00000025663 | transmembrane protein 2                                                                                                                                       | unknown | 2.2 | -1.3 |
| ENSMUST00000056756 | opposite strand transcription unit to Stag3                                                                                                                   | unknown | 1.8 | -1.5 |
| ENSMUST00000021177 | SEC14-like 1 (S. cerevisiae)                                                                                                                                  | unknown | 2.9 | -1.4 |
| ENSMUST00000035121 | angiominin like 2 [Source:MarkerSymbol;Acc:MGI:1929286]                                                                                                       | unknown | 1.4 | -1.3 |
| ENSMUST00000023251 | lymphocyte antigen 6 complex, locus E [Source:MarkerSymbol;Acc:MGI:106651]                                                                                    | unknown | 2.1 | -1.8 |
| ENSMUST00000089123 | RIKEN cDNA 5430432M24 gene (5430432M24Rik)                                                                                                                    | unknown | 9.1 | -3.3 |
| ENSMUST00000085261 | RIKEN cDNA 6330442E10 gene (6330442E10Rik), mRNA [Source:RefSeq_dna;Acc:NM_178745]                                                                            | unknown | 1.3 | -2.1 |
| ENSMUST00000064444 | gene model 50, (NCBI) [Source:MarkerSymbol;Acc:MGI:2684896]                                                                                                   | unknown | 1.4 | -1.5 |
| ENSMUST00000093088 | genetic suppressor element 1                                                                                                                                  | unknown | 1.7 | -1.5 |
| ENSMUST00000027837 | loop tail associated protein [Source:MarkerSymbol;Acc:MGI:2135272]                                                                                            | unknown | 1.4 | -1.4 |
| ENSMUST00000061262 | podocalyxin-like 2 [Source:MarkerSymbol;Acc:MGI:2442488]                                                                                                      | unknown | 2.0 | -2.9 |
| ENSMUST00000093335 | Integrase (Fragment). [Source:Uniprot/SPTREMBL;Acc:Q811N0]                                                                                                    | unknown | 1.6 | -2.1 |
| ENSMUST00000045270 | core-binding factor, runt domain, alpha subunit 2, translocated to, 2 homolog (human)                                                                         | unknown | 2.6 | -1.8 |
| ENSMUST00000043356 | RIKEN cDNA 0610010F05                                                                                                                                         | unknown | 1.9 | -2.0 |
| ENSMUST00000039506 | immunoglobulin superfamily, member 8 [Source:MarkerSymbol;Acc:MGI:2154090]                                                                                    | unknown | 1.7 | -2.6 |

## Mash1 targets

| Ensembl Transcript ID | Description                                     | Gene Ontology               | Mash1GOF | Mash1-/- |
|-----------------------|-------------------------------------------------|-----------------------------|----------|----------|
| ENSMUST00000034472    | junction adhesion molecule 3                    | cell adhesion               | 1.3      | -1.5     |
| ENSMUST00000035129    | Eph receptor B1                                 | cell adhesion               | 1.5      | -1.5     |
| ENSMUST00000035499    | neighbor of Punc E11                            | cell adhesion               | 1.6      | -2.1     |
| ENSMUST00000020692    | B-cell translocation gene 2, anti-proliferative | cell cycle                  | 1.5      | -1.7     |
| ENSMUST00000021903    | growth arrest and DNA-damage-inducible 45 gamma | cell cycle                  | 1.4      | -5.6     |
| ENSMUST00000022639    | neurofilament, light polypeptide                | cytoskeleton                | 2.3      | -1.8     |
| ENSMUST00000027687    | ubiquitin-conjugating enzyme E2T (putative)     | enzyme                      | 1.7      | -1.5     |
| ENSMUST00000045043    | RAN binding protein 9                           | protein binding             | 1.3      | -1.3     |
| ENSMUST00000050706    | glucocorticoid induced transcript 1             | protein binding             | 2.1      | -1.9     |
| ENSMUST00000020243    | achaete-scute complex homolog-like 1            | regulation of transcription | 39.2     | -39.5    |
| ENSMUST00000025081    | zinc finger homeobox 1a                         | regulation of transcription | 1.7      | -1.4     |
| ENSMUST00000029852    | LIM homeobox protein 8                          | regulation of transcription | 1.5      | -2.0     |
| ENSMUST00000036060    | ISL1 transcription factor, LIM/homeodomain      | regulation of transcription | 2.4      | -1.8     |
| ENSMUST00000049621    | hairy and enhancer of split 5                   | regulation of transcription | 1.5      | -10.5    |

|                    |                                                  |                              |     |      |
|--------------------|--------------------------------------------------|------------------------------|-----|------|
| ENSMUST00000053491 | POU domain, class 3, transcription factor 1      | regulation of transcription  | 1.6 | -1.4 |
| ENSMUST00000086851 | hairy and enhancer of split 6                    | regulation of transcription  | 2.4 | -2.3 |
| ENSMUST00000001386 | ELAV like 4 (Hu antigen D)                       | RNA binding                  | 1.7 | -1.7 |
| ENSMUST00000025363 | heparin-binding EGF-like growth factor           | signal transduction/Receptor | 1.4 | -1.4 |
| ENSMUST00000027748 | regulator of G-protein signaling 16              | signal transduction/Receptor | 4.6 | -1.4 |
| ENSMUST00000033133 | regulator of G-protein signaling 10              | signal transduction/Receptor | 2.1 | -1.8 |
| ENSMUST00000041776 | Regulator of G-protein signaling 8               | signal transduction/Receptor | 7.4 | -1.7 |
| ENSMUST00000065587 | chemokine orphan receptor 1                      | signal transduction/Receptor | 1.4 | -1.4 |
| ENSMUST00000073392 | retinitis pigmentosa GTPase regulator            | signal transduction/Receptor | 1.5 | -1.3 |
| ENSMUST00000090679 | tachykinin 1                                     | signal transduction/Receptor | 2.6 | -1.4 |
| ENSMUST00000018478 | kinase suppressor of ras                         | signal transduction/Receptor | 1.8 | -1.4 |
| ENSMUST00000018313 | manic fringe homolog                             | signal transduction/Receptor | 2.8 | -2.8 |
| ENSMUST00000017836 | rhomoid, veinlet-like 4                          | signal transduction/Receptor | 8.2 | -2.7 |
| ENSMUST00000031555 | lunatic fringe gene homolog                      | signal transduction/Receptor | 1.8 | -4.8 |
| ENSMUST00000014917 | delta-like 1                                     | signal transduction/Receptor | 2.0 | -3.6 |
| ENSMUST00000059285 | Notch-regulated ankyrin repeat protein           | signal transduction/Receptor | 1.9 | -3.2 |
| ENSMUST00000082054 | regulating synaptic membrane exocytosis 2        | transport                    | 1.3 | -1.3 |
| ENSMUST00000025178 | vacuolar protein sorting 52 (yeast)              | transport                    | 1.8 | -1.5 |
| ENSMUST00000030317 | podoplanin                                       | transport                    | 2.2 | -4.1 |
| ENSMUST00000042329 | nuclear transport factor 2-like export factor 2  | transport                    | 1.3 | -1.5 |
| ENSMUST00000045738 | Viaa1, solute carrier family 32 member 1         | transport                    | 1.7 | -1.3 |
| ENSMUST00000044048 | heat shock protein, alpha-crystallin-related, B6 | unknown                      | 1.3 | -1.3 |
| ENSMUST00000025058 | ankyrin repeat and SAM domain containing 1       | unknown                      | 4.2 | -1.8 |
| ENSMUST00000028257 | grancalcin                                       | unknown                      | 2.5 | -1.8 |
| ENSMUST00000039506 | immunoglobulin superfamily, member 8             | unknown                      | 1.6 | -1.7 |
| ENSMUST00000042499 | tripartite motif-containing 59                   | unknown                      | 1.3 | -1.4 |
| ENSMUST00000058009 | RIKEN cDNA 633050D04                             | unknown                      | 1.3 | -1.5 |
| ENSMUST00000065118 | PREDICTED: hypothetical protein LOC76980         | unknown                      | 1.9 | -1.4 |
| ENSMUST00000069180 | RIKEN cDNA 2310047A01                            | unknown                      | 1.6 | -2.2 |
| ENSMUST00000085669 | RIKEN cDNA 5730507C01                            | unknown                      | 1.3 | -1.4 |
| ENSMUST00000087702 | RIKEN cDNA 2210010L05 gene                       | unknown                      | 1.4 | -1.3 |

### Common targets

| Ensembl Transcript ID | Description                                     | Gene Ontology                | Ngn2GOF | Mash1GOF | Mash1-/- | Mash1-/-;Ngn2-/- |
|-----------------------|-------------------------------------------------|------------------------------|---------|----------|----------|------------------|
| ENSMUST00000035499    | neighbor of Punc E11                            | cell adhesion                | 1.4     | 1.6      | -2.1     | -1.6             |
| ENSMUST00000020692    | B-cell translocation gene 2, anti-proliferative | cell cycle                   | 2.9     | 1.5      | -1.7     | -1.4             |
| ENSMUST00000049621    | hairy and enhancer of split 5                   | regulation of transcription  | 1.5     | 1.5      | -10.5    | -20.8            |
| ENSMUST00000086851    | hairy and enhancer of split 6                   | regulation of transcription  | 6.0     | 2.4      | -2.3     | -2.9             |
| ENSMUST00000001386    | ELAV like 4 (Hu antigen D)                      | RNA binding                  | 1.9     | 1.7      | -1.7     | -2.7             |
| ENSMUST00000065587    | chemokine orphan receptor 1                     | signal transduction/Receptor | 1.8     | 1.4      | -1.4     | -5.1             |
| ENSMUST00000017836    | rhomoid, veinlet-like 4                         | signal transduction/Receptor | 9.8     | 8.2      | -2.7     | -2.7             |
| ENSMUST00000018313    | manic fringe homolog                            | signal transduction/Receptor | 2.9     | 2.8      | -2.8     | -3.2             |
| ENSMUST00000014917    | delta-like 1                                    | signal transduction/Receptor | 2.0     | 2.0      | -3.6     | -2.5             |
| ENSMUST00000039506    | immunoglobulin superfamily, member 8            | unknown                      | 1.7     | 1.6      | -1.7     | -2.6             |
