# Supplementary material for: Characterization of the proneural gene regulatory network during mouse telencephalon development
Source: PubMed Central journal article supplement (PMC2330019; doi:10.1186/1741-7007-6-15), 2008-03-31
Supplement: 1741-7007-6-15-S5.pdf [file 1741-7007-6-15-S5.pdf]

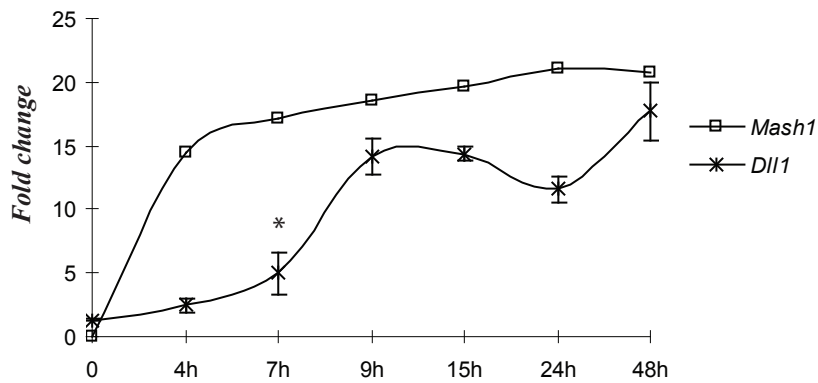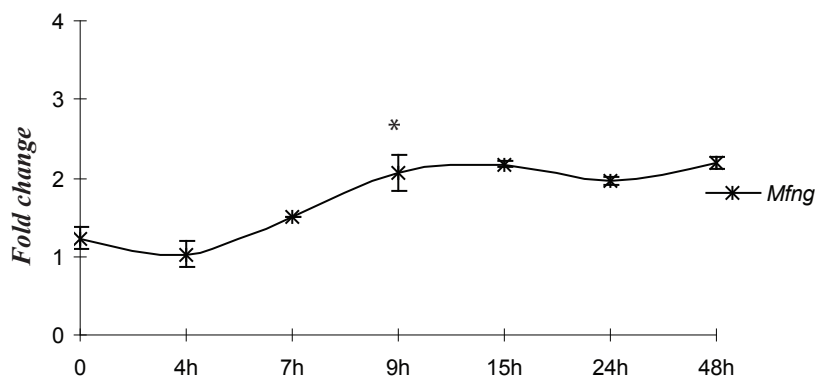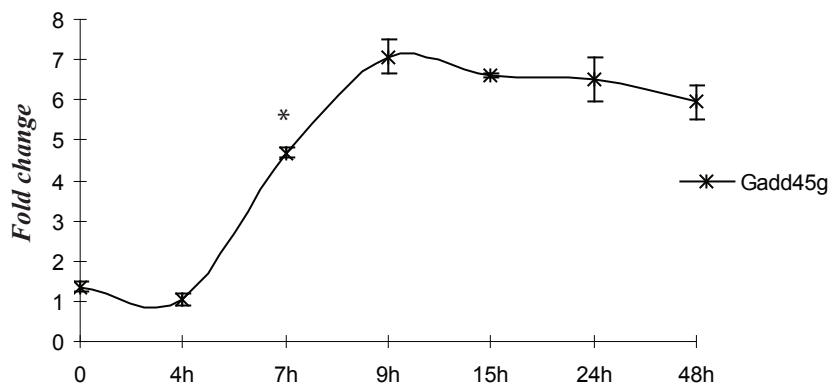

Additional file 5. Quantitative PCR analysis of predicted Mash1 targets in P19 cells following transfection of a Mash1 expression vector. A significant upregulation of Dll1, Mfng and Gadd45g is detected between 7hrs and 9hrs after transfection (\*). Fold change were normalized with HMBS (hydroxymethylbilane synthase) as a reference.
