# Supplementary material for: Characterization of the proneural gene regulatory network during mouse telencephalon development
Source: PubMed Central journal article supplement (PMC2330019; doi:10.1186/1741-7007-6-15), 2008-03-31
Supplement: 1741-7007-6-15-S7.pdf [file 1741-7007-6-15-S7.pdf]

### ***Ngn2* Consensus**

|           |          |      |
|-----------|----------|------|
| NeuroD E1 | CCATATGG | Ref1 |
| NeuroD E2 | ACAGATGG | Ref1 |
| NeuroD2   | ACAGATGG | Ref2 |
| Dll1 E1   | GCAGATGG | Ref3 |
| Dll1 E2   | CCAAATGG | Ref3 |
| Consensus | NCANATGG |      |

### ***Mash1* Consensus**

|             |          |         |
|-------------|----------|---------|
| Brd E1      | GCAGGTGT | Ref4    |
| Sca E1      | GCAGGTGG | Ref4    |
| E(spl)m7 E2 | GCAGCTGT | Ref4    |
| Consensus 1 | GCAGSTGK | Ref4, 5 |
| Dll1 E3     | CAGGTG   | Ref3    |
| Dll1 E4     | CAGCTG   | Ref3    |
| Consensus 2 | CAGSTG   | Ref3, 6 |

Ref1: Huang HP, Liu M, El-Hodiri HM, Chu K, Jamrich M, Tsai MJ. Mol Cell Biol. 2000 May;20(9):3292-307

Ref2: Lin CH, Stoeck J, Ravanpay AC, Guillemot F, Tapscott SJ, Olson JM. Dev Biol. 2004 Jan 1;265(1):234-45

Ref3: Castro, D.S., et al. Dev Cell, 2006. 11(6): p. 831-844

Ref4: Singson, A., M.W. Leviten, A. G. Bang, X. H. Hua, and J.W. Posakony. Genes Dev. 8:2058-2071

Ref5: Powell LM, Zur Lage PI, Prentice DR, Senthinathan B, Jarman AP. Mol Cell Biol. 2004 Nov;24(21):9517-26

Ref6: Hu Y, Wang T, Stormo GD, Gordon JL. Proc Natl Acad Sci U S A. 2004 Apr 13;101(15):5559-64
