# Supplementary material for: Characterization of the proneural gene regulatory network during mouse telencephalon development
Source: PubMed Central journal article supplement (PMC2330019; doi:10.1186/1741-7007-6-15), 2008-03-31
Supplement: 1741-7007-6-15-S8.pdf [file 1741-7007-6-15-S8.pdf]

**Ngn2 target**

Atp9a  
Crabp1  
Dusp14  
Acpl2  
Corob2  
Fzd1  
Auts2  
Nhlh1  
Bai2  
Wnt7b  
Bhlhb5

**Mash1 target**

Rarb  
Pou3f1  
Dlx1  
Stk33  
Pdpn  
Insm1  
Lmo1  
Isl1  
Anks1  
Lfng  
Gadd45g  
Glcci1  
Lhx8  
Gca

**Mash1/Ngn2  
target**

Mfng  
Hes6  
Dil1  
Hes5  
Btg2  
Elavl4
