# Supplementary material for: Characterization of the proneural gene regulatory network during mouse telencephalon development
Source: PubMed Central journal article supplement (PMC2330019; doi:10.1186/1741-7007-6-15), 2008-03-31

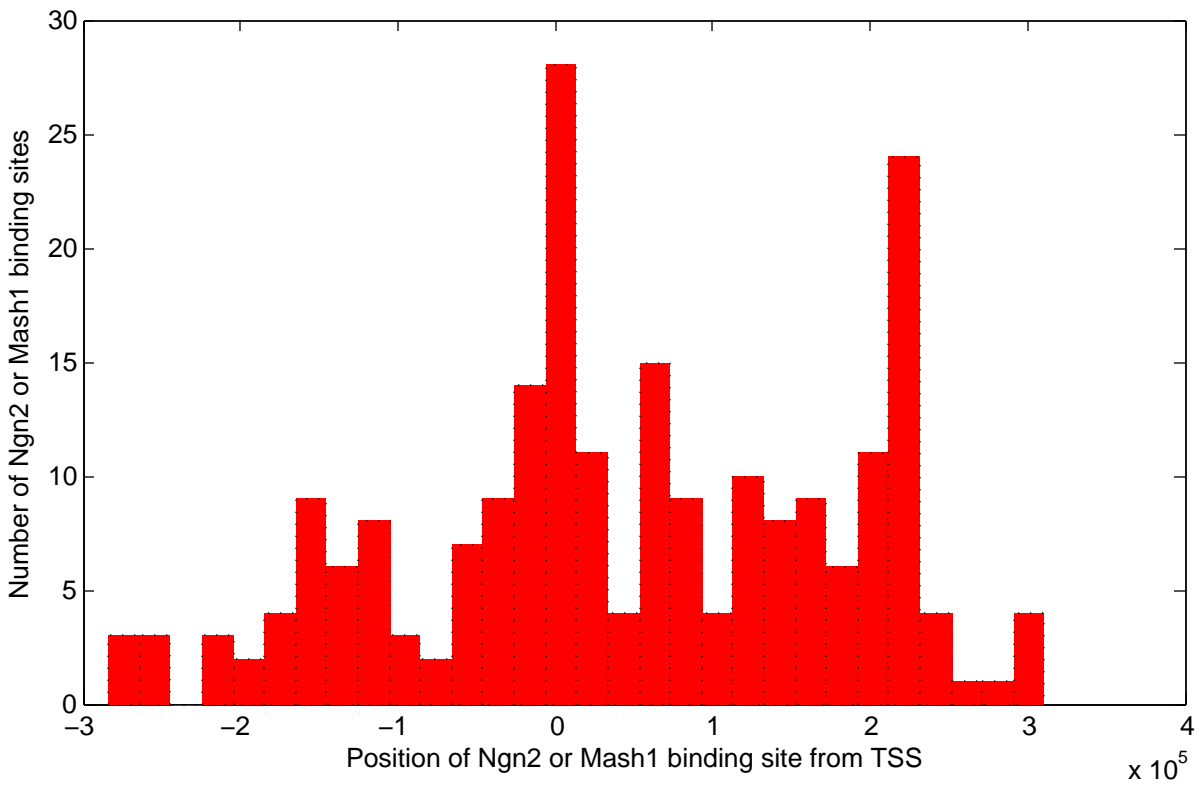

Supplement: 1741-7007-6-15-S11.pdf [file 1741-7007-6-15-S11.pdf]
